# Supplementary material
Source: Springer Nature journal article supplement (https://www.springermedizin.de/resource/supplementary/10194_2014_609_MOESM2_ESM.pdf/9423274)

BMI

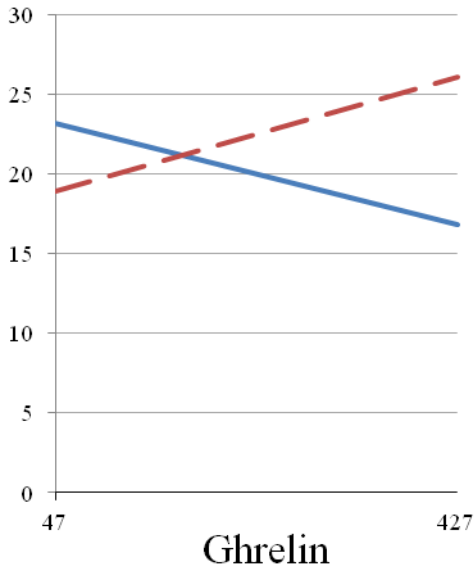

— No Anxiety

- - Anxiety

Supplement: MOESM2 [file 9423274]
